# Supplementary material for: Classic ataxia-telangiectasia: the phenotype of long-term survivors
Source: PubMed Central journal article supplement (PMC7035236; doi:10.1007/s00415-019-09641-1), 2019-11-27
Supplement: 415_2019_9641_MOESM4_ESM.pdf [file 415_2019_9641_MOESM4_ESM.pdf]

**Online Resource 4:** Characteristics of 14 classic A-T patients from the literature.

|                        | Patient | Ataxia (years) | Wheelchair (years) | Immunodeficiency | Recurrent infections | Malignancy | Telangiectasias | AFP (ng/ml) | ATM mutations | Chromosomal rearrangements / radio sensitivity |
|------------------------|---------|----------------|--------------------|------------------|----------------------|------------|-----------------|-------------|---------------|------------------------------------------------|
| <b>Goodman 1969</b>    | 1       | <1             | 10                 | Yes, IgA         | Yes                  | x          | Yes             | x           | x             | x                                              |
|                        | 2       | 1              | 10                 | Yes, IgA         | Yes                  | x          | Yes             | x           | x             | Yes                                            |
| <b>Amromin 1977</b>    |         | <1             | 9                  | Yes, IgA         | Yes                  | Yes        | Yes             | 1200        | x             | Yes                                            |
| <b>Agamanolis 1979</b> |         | 5              | <20                | No               | Yes                  | No         | Yes             | x           | x             | Yes                                            |
| <b>Cabot 1987</b>      | Case 2  | 2              | 10                 | x                | No                   | Yes        | Yes             | 296         | x             | x                                              |
| <b>Mock 1988</b>       |         | Infancy        | Childhood          | Yes, IgA         | No                   | Yes        | Yes             | x           | x             | Yes                                            |
| <b>Kovacs 1997</b>     | Case 2  | 3              | x                  | x                | x                    | Yes        | Yes             | x           | x             | Yes                                            |
|                        | Case 3  | 2              | 10                 | Yes              | No                   | No         | Yes             | x           | x             | x                                              |
| <b>Opeskin 1998</b>    |         | x              | x                  | x                | Yes                  | Yes        | Yes             | x           |               | Yes                                            |
| <b>Degan 2007</b>      | LA      | x              | x                  | Yes              | Yes                  | x          | Yes             | High        | Yes           | x                                              |
| <b>Habek 2008</b>      |         | 1              | <10                | Yes, IgG         | Yes                  | Yes        | Yes             | 518         | x             | Yes                                            |
| <b>Lockman 2012</b>    | E       | x              | Yes                | x                | x                    | Yes        | Yes             | x           | Yes           | x                                              |
|                        | G       | x              | Yes                | No               | No                   | No         | x               | x           | Yes           | x                                              |
| <b>Lin 2014</b>        | 9       | x              | x                  | x                | x                    | x          | x               | 484         | x             | Yes                                            |

x = not noted.
